# Supplementary material for: Attention to colors induces surround suppression at category boundaries
Source: PubMed Central journal article supplement (PMC6363742; doi:10.1038/s41598-018-37610-7), 2019-02-05
Supplement: 41598_2018_37610_MOESM1_ESM.pdf [file 41598_2018_37610_MOESM1_ESM.pdf]

# 1 **Supplementary Materials**

## 2 **Attention to colors induces surround suppression at category boundaries**

3 **Ming W.H. Fang, Mark W. Becker, Taosheng Liu\***

4

### 5 **Neural model for surround suppression at categorical boundaries**

6

7 Our goal here is to build the simplest model that is informed by physiological data to produce  
8 the attentional profile measured in our psychophysical experiments. The advantage of this  
9 approach, compared to a full-blown model such as multi-layered neural network model, is that  
10 we have a much better understanding of how model parameters impacts its behavior. However,  
11 simplicity is only achievable by ignoring many physiological details and as such, our model is  
12 more of a proof-of-concept than a complete description of the physiological processes.  
13 Nevertheless, such a model can still give useful insights regarding the neural mechanisms of  
14 attention.

15

16 The model contains a bank of identical, uniformly distributed, color-tuned neurons spanning  
17 the 360° space defined by the color wheel. Each neuron's tuning curve is assumed to be a  
18 circular Gaussian function (von Mises function)

$$19 \quad R_{ij} = \frac{e^{\kappa \cos(\theta_j - \mu_i)}}{2\pi I_0(\kappa)} \cdot (A - s) + s \quad (1),$$

20 where  $R_{ij}$  is the  $i$ -th neuron's response to a colored dot  $\theta_j$ ,  $\kappa$  is the concentration parameter that  
21 controls the spread of the tuning function, and  $\mu_i$  is the neuron's preferred color.  $I_0(\kappa)$  is the  
22 Bessel function of order 0. Parameter  $A$  denotes the firing rate to the preferred color, and  $s$   
23 represents the spontaneous firing rate. The model contains 90 neurons with  $\kappa = 12$ ,  $s = 10$   
24 spikes/s,  $A = 40$  spikes/s. The parameter values are based on relevant physiological findings  
25 (see Table S1 for the full list of parameters and their values). For simplicity, we assumed no  
26 neural noise or inter-neuronal correlation.

27

28 In a simulated trial of the 2-IFC task, the model is "shown" two random dot color stimuli, a  
29 noise pattern with random colors and a signal pattern at a particular color coherence. Each dot

30 independently evokes responses across all neurons, which are computed using Eq. (1). Each  
31 neuron's response is determined by averaging its responses to all dots in the stimulus, which  
32 is computed by

$$33 \quad R_i = \frac{1}{N} \sum_{j=1}^N R_{ij} \quad (2),$$

34 where  $N$  is the total number of color dots in each stimuli array (fixed at 100), and  $R_i$  is the  
35 neuron's average response to all dots. The response across all neurons to a dot array thus  
36 constitutes a population neural response and is the basis of the model's decision. For each  
37 stimulus interval, we fitted a Gaussian template (Eq. (1)) to the population response using  
38 maximum likelihood estimation (MLE), which had four free parameters – amplitude ( $A$ ), mean  
39 ( $\mu_i$ ), variance ( $\kappa$ ), and intercept ( $s$ ). As the 2-IFC task requires participants to detect a stronger  
40 color signal, we used the estimated amplitude ( $A$ ) as the decision criterion. The model simply  
41 chose the stimulus interval with a higher amplitude estimate as the target.

42

43 We first performed baseline simulations by presenting the model with color stimuli of different  
44 coherence levels. The model's choice for each trial was recorded and the proportion correct  
45 rate was calculated. For all results presented here, we simulated 2000 trials for each condition.  
46 In this baseline (neutral) condition, the model performed better with higher color coherence,  
47 similar to human observers (Fig. S1a). We also checked the population response for stimuli of  
48 different coherence levels and found it to increase monotonically with coherence (Fig. S1b).  
49 This increase in population response thus reflected the increase in the signal strength and was  
50 appropriately registered by the model. For the main simulations, we fixed the color coherence  
51 at 0.1 as it produces an intermediate performance level in the neutral condition. Indeed, this  
52 coherence level was comparable to coherence thresholds measured in our human participants  
53 (cf. Fig 5).

54

55 For attention condition, we first simulated the experiment with a pure feature-similarity gain  
56 modulation, which was implemented as a linear function:

$$57 \quad G_{\text{FSG}} = b - a * |(\theta_{\text{attend}} - \theta_{\text{target}})| \quad (3),$$

58 where  $G_{FSG}$  is the gain factor,  $b$  denotes the intercept of the attentional gain, and  $a$  represents  
59 the slope. This equation expresses the FSG principle: the attentional gain factor for a target  
60 feature (i.e.,  $\theta_{target}$ ) depends on its difference (similarity) to the attended feature (i.e.,  $\theta_{attend}$ ).  
61 Without losing generality, we assumed  $\theta_{attend} = 0^\circ$ . Values of  $a$  and  $b$  were based on published  
62 values from monkey MT (Martinez-Trujillo & Treue, 2004, see Table S1). The FSG modulation  
63 led to a simple scaling of all the tuning curves (Fig. S2a). To facilitate the understanding of the  
64 model behavior, we plotted the model's population response to a color signal under the  
65 attention and neutral condition for a few selected cue-target offset (Fig. S2b). As can be seen,  
66 compared to the neutral condition, population response for the  $0^\circ$  target was higher and  
67 gradually declined as target deviated more from  $0^\circ$  such that at large offsets, it became lower  
68 than the neutral condition. This monotonic decline of population response underlies the  
69 model's monotonic cueing effect (Fig. 8d).

70

71 Next, we implemented a hybrid model by combining the FSG modulation with neuronal tuning  
72 shifts (Fig. S3a). The FSG factor is calculated using Eq. 3 above. The magnitude of neurons'  
73 tuning shift towards the cued color,  $M$ , is calculated by a piece-wise linear function,

$$74 \quad M = \begin{cases} 0.5 \cdot (\theta_i - \theta_{attend}), & \text{if } |\theta_i| \leq w, \\ 3 \cdot w \cdot \text{sgn}(\theta_i) - 2.5 \cdot \theta_i, & \text{if } w < |\theta_i| \leq 1.2w, \\ 0, & \text{if } 1.2w < |\theta_i| \leq 180^\circ \end{cases} \quad (4)$$

75 where  $w$  denotes the boundary ( $40^\circ$  in current case),  $\theta_i$  is the neuron's original tuning  
76 preference, and  $\theta_{attend}$  denotes the attended color (fixed at  $0^\circ$ ), and  $\text{sgn}$  is the sign function.  
77 This results in a larger shift as neurons move further away from the attended feature followed  
78 by a reduced shift beyond the category boundary (see Fig. 8f). Once  $M$  declines to 0, the  
79 tuning shift would stop. Under this scenario, neuronal responses were calculated in the same  
80 fashion as in Eq. (1), except that neuron's preferred color ( $\mu_i$ ), was replaced by  $(\mu_i - M)$ ,  
81 representing a shift in tuning preference.

82

83 The population responses under this hybrid modulation exhibited a non-monotonic profile.  
84 Critically, there was a suppression of population response for the boundary color compared to  
85 neutral baseline (Fig. S3b,  $40^\circ$ ), which was not seen in the FSG only condition (cf. Fig. S2b,

86 40°). This was followed by a relative increase in population response at 60°, signifying a  
87 rebound. Finally, for large feature offsets such as 140°, there was a further suppression, as a  
88 result of FSG modulation. These qualitative observations on the population responses were  
89 registered by our model using the simple read-out rule described earlier, resulting in a hybrid of  
90 surround suppression and feature-similarity gain modulation in its performance (see Fig. 8g).

91

92 To verify whether surround suppression can appear at the categorical boundaries, we  
93 simulated the experiment with a number of different category width (e.g.,  $\pm 30^\circ$ ,  $\pm 50^\circ$ ,  $\pm 60^\circ$ ,  $\pm 70^\circ$ ,  
94  $\pm 80^\circ$  boundaries) and observed the suppressive surround occurring at the category boundaries.  
95 We also explored different shifting parameters that control the exact shape of the shifting  
96 function (Fig. 8f) and found that as long as the tuning shift returns to zero beyond the category  
97 boundary relative quickly, the model produces a surround suppression at the boundaries. For  
98 example, the slope of the declining portion of tuning shift beyond the boundary can be  
99 shallower. We also used a sinusoidal tuning shifting function and found similar results with the  
100 piece-wise linear function in Eq. 4.

101

102

103  
104

**a**

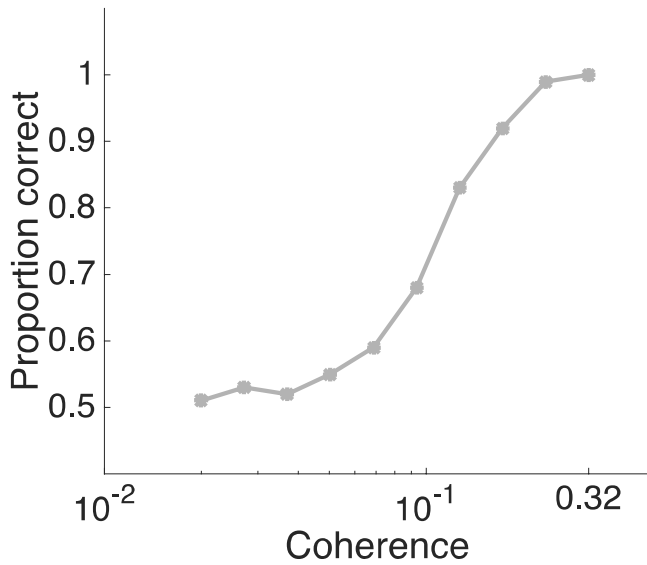

**b**

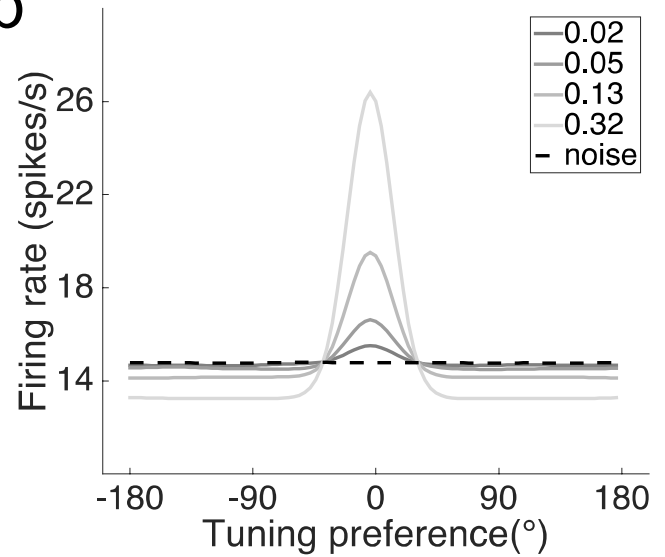

106 Figure S1. The model's neutral (baseline) performance and population responses under  
107 variable coherence levels. a). The model performed better as the coherence of color stimuli  
108 increased. b) Average population response across trials for a few selected coherence levels  
109 (gray lines). The dashed black line denotes the average population response for the noise  
110 stimuli.

111  
112  
113  
114  
115  
116  
117  
118  
119  
120  
121  
122  
123

124  
125  
126  
127  
128

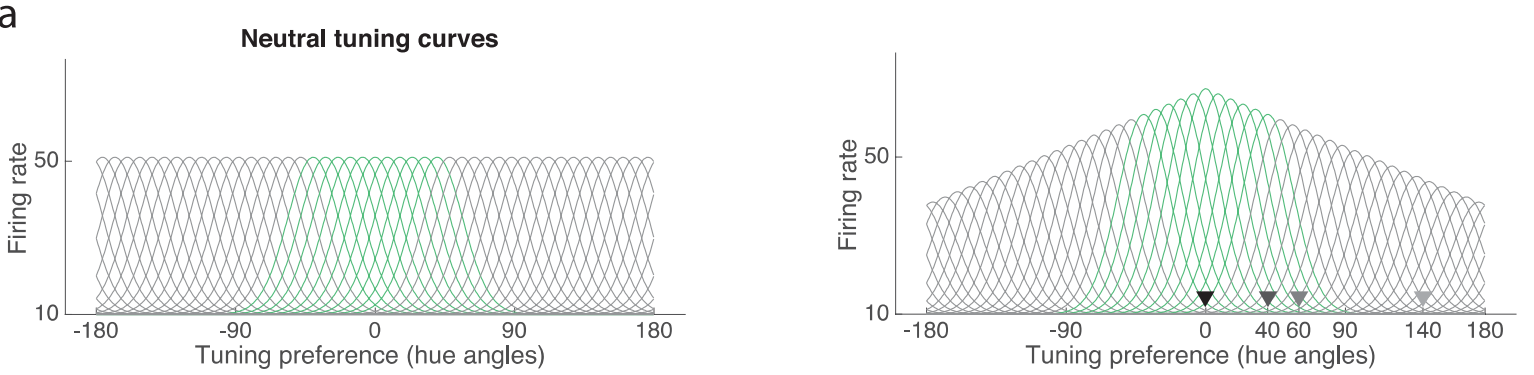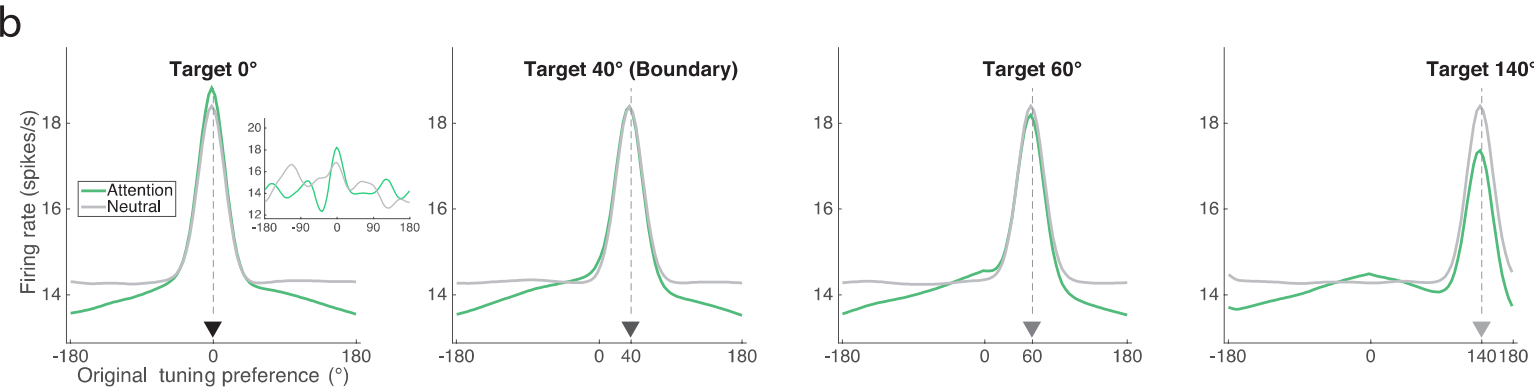

129  
130  
131  
132  
133  
134  
135  
136  
137  
138

Figure S2. Pure FSG modulation on neural responses. **a**). Groups of neuronal tuning curves in the neutral condition (left panel) and the attention condition due to FSG modulation (right panel). Attended feature is assumed to be at 0°. **b**). Example average population responses to a color signal at four cue-target offsets. There was a monotonic decrease in the population responses (green curves) compared to neutral baselines (gray curves). The population responses were averaged across 2000 trials and thus appear quite smooth. Population responses on individual trials were much noisier. The inset in the left most panel shows population responses on a single trial.

a

Neutral tuning curves

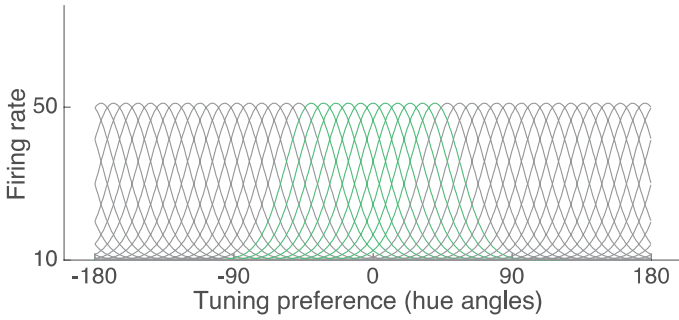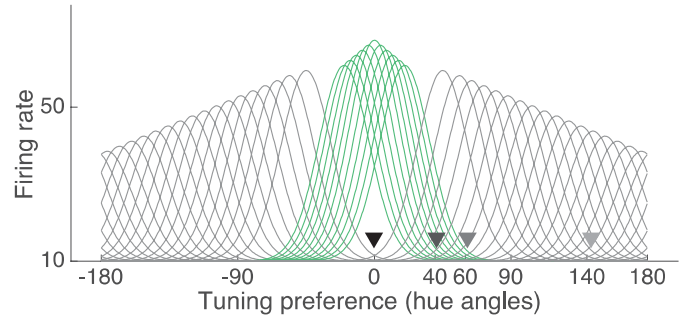

b

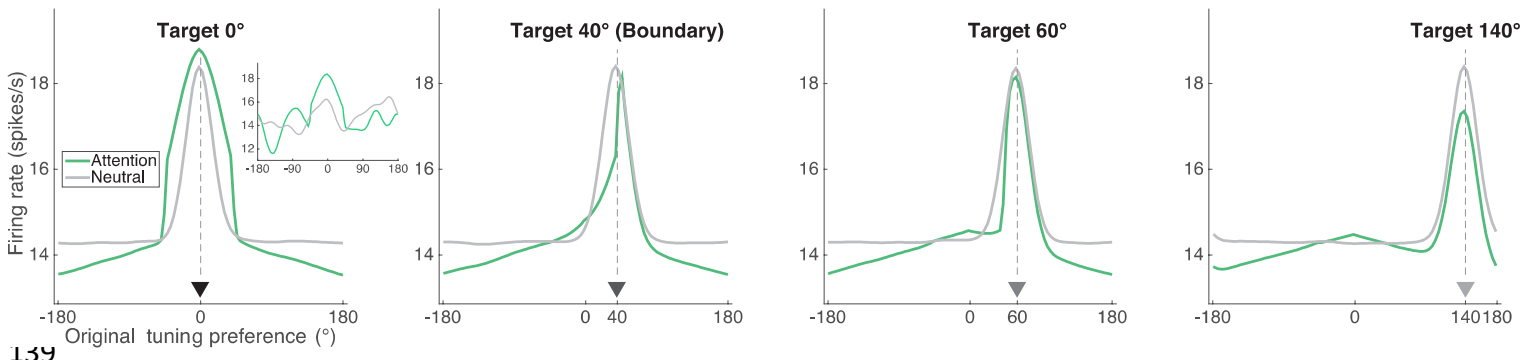

139

140 Figure S3. Combined modulation of FSG and tuning shift on neural responses. **a)** In addition  
 141 to FSG modulation, neurons also shifted toward the category center. **b)** Example population  
 142 responses to a color signal at four cue-target offset. Note the population responses in the  
 143 attention condition (green curves) changed non-monotonically compared to neutral baselines  
 144 (gray curves). The smooth population responses were averaged across 2000 trials. Examples  
 145 of population responses on a single trial are shown in the inset of the left most panel.

146

147

148

149

150

151

152

153

154

155

156

157 Table 1. Parameters and their values used in the neural model simulation.

| Name     | Value       | Description                                                                                                                                           |
|----------|-------------|-------------------------------------------------------------------------------------------------------------------------------------------------------|
| $\kappa$ | 12          | Single neuron's tuning bandwidth, equivalent to a bandwidth of $\sim 39^\circ$ , similar to previously reported value (Conway, Moeller, & Tsao, 2007) |
| b        | 1.0372      | Intercept of attentional gain factor in the FSG model, based on values reported by Martinez-Trujillo, & Treue (2004)                                  |
| a        | 0.00093     | Slope of attentional gain factor in the FSG model, based on values reported by Martinez-Trujillo, & Treue (2004)                                      |
| N        | 100         | Number of colored dots in the simulation                                                                                                              |
| s        | 10 spikes/s | Neuron's spontaneous firing rate                                                                                                                      |
| A        | 40 spikes/s | Neuron's firing rate to its preferred color                                                                                                           |

158

159

160
